# Supplementary material for: Intermediate and Long-term Outcomes of Survivors of Acute Kidney Injury Episodes: A Large Population-Based Cohort Study
Source: PubMed Central journal article supplement (PMC5176133; doi:10.1053/j.ajkd.2016.05.018), 2017-01
Supplement: mmc1.pdf [file mmc1.pdf]

**Table S1 – Patient characteristics by AKI severity in eGFR subgroups**

|                                           | Baseline eGFR 45-59 ml/min/1.73m <sup>2</sup> |                     |                     |                     | Baseline eGFR 30-44 ml/min/1.73m <sup>2</sup> |                     |                     |                     | Baseline eGFR <30ml/min/1.73m <sup>2</sup> |                     |                     |                     |
|-------------------------------------------|-----------------------------------------------|---------------------|---------------------|---------------------|-----------------------------------------------|---------------------|---------------------|---------------------|--------------------------------------------|---------------------|---------------------|---------------------|
|                                           | No AKI                                        | AKI 1               | AKI 2               | AKI 3               | No AKI                                        | AKI 1               | AKI 2               | AKI 3               | No AKI                                     | AKI 1               | AKI 2               | AKI 3               |
| n                                         | 3672                                          | 375                 | 157                 | 72                  | 1666                                          | 287                 | 88                  | 49                  | 597                                        | 147                 | 26                  | 67                  |
| <b>CHARACTERISTICS</b>                    |                                               |                     |                     |                     |                                               |                     |                     |                     |                                            |                     |                     |                     |
| Median age in years (IQR)                 | 76 (69-83)                                    | 81 (73-85)          | 81 (73-86)          | 78 (78-83)          | 81 (74-87)                                    | 82 (76-88)          | 83 (75-88)          | 81 (75-85)          | 82 (75-88)                                 | 81 (75-87)          | 82 (75-87)          | 77 (65-84)          |
| Age ≥70 years                             | 2737 (74.5)                                   | 321 (85.6)          | 137 (87.3)          | 57 (79.2)           | 1420 (85.2)                                   | 255 (88.9)          | 76 (86.4)           | 46 (93.9)           | 502 (84.1)                                 | 123 (83.7)          | 23 (88.5)           | 45 (67.2)           |
| Female                                    | 2185 (59.5)                                   | 211 (56.3)          | 93 (59.2)           | 37 (51.4)           | 1033 (62.0)                                   | 165 (57.5)          | 56 (63.6)           | 23 (46.9)           | 360 (60.3)                                 | 87 (59.2)           | 16 (61.5)           | 31 (46.3)           |
| Male                                      | 1487 (40.5)                                   | 164 (43.7)          | 64 (40.8)           | 35 (48.6)           | 633 (38.0)                                    | 122 (42.5)          | 32 (36.4)           | 26 (53.1)           | 237 (39.7)                                 | 60 (40.8)           | 10 (38.5)           | 36 (53.7)           |
| <sup>a</sup> Medical or other ward        | 1902 (51.8)                                   | 163 (43.5)          | 72 (45.9)           | 30 (41.7)           | 855 (51.3)                                    | 123 (42.9)          | 29 (33.0)           | 24 (49.0)           | 231 (38.7)                                 | 66 (44.9)           | 9 (34.6)            | 32 (47.8)           |
| Care of the elderly ward                  | 328 (8.9)                                     | 77 (20.5)           | 31 (19.7)           | 9 (12.5)            | 226 (13.6)                                    | 69 (24.0)           | 22 (25.0)           | 11 (22.4)           | 86 (14.4)                                  | 26 (17.7)           | 5 (19.2)            | 12 (17.9)           |
| Surgical ward                             | 1209 (32.9)                                   | 60 (16.0)           | 17 (10.8)           | 10 (13.9)           | 479 (28.8)                                    | 39 (13.6)           | 12 (13.6)           | 8 (16.3)            | 140 (23.5)                                 | 24 (16.3)           | <5 <sup>a</sup> (-) | 7 (10.4)            |
| Critical care unit                        | 233 (6.3)                                     | 75 (20.0)           | 37 (23.6)           | 23 (31.9)           | 106 (6.4)                                     | 56 (19.5)           | 25 (28.4)           | 6 (12.2)            | 140 (23.5)                                 | 31 (21.1)           | 9 (34.6)            | 16 (23.9)           |
| <b><sup>a</sup>CHARLSON COMORBIDITIES</b> |                                               |                     |                     |                     |                                               |                     |                     |                     |                                            |                     |                     |                     |
| Myocardial infarction                     | 227 (6.2)                                     | 52 (13.9)           | 11 (7.0)            | 12 (16.7)           | 138 (8.3)                                     | 51 (17.8)           | 15 (17.0)           | 7 (14.3)            | 53 (8.9)                                   | 20 (13.6)           | <5 <sup>a</sup> (-) | 10 (14.9)           |
| Congestive heart failure                  | 224 (6.1)                                     | 56 (14.9)           | 24 (15.3)           | 19 (26.4)           | 181 (10.9)                                    | 68 (23.7)           | 27 (30.7)           | 13 (26.5)           | 94 (15.7)                                  | 33 (22.4)           | 10 (38.5)           | 15 (22.4)           |
| Peripheral vascular disease               | 143 (3.9)                                     | 39 (10.4)           | 16 (10.2)           | 6 (8.3)             | 97 (5.8)                                      | 44 (15.3)           | 8 (9.1)             | <5 <sup>a</sup> (-) | 45 (7.5)                                   | 14 (9.5)            | <5 <sup>a</sup> (-) | <5 <sup>a</sup> (-) |
| Cerebrovascular disease                   | 226 (6.2)                                     | 46 (12.3)           | 16 (10.2)           | <5 <sup>a</sup> (-) | 147 (8.8)                                     | 34 (11.8)           | 6 (6.8)             | 5 (10.2)            | 66 (11.1)                                  | 14 (9.5)            | <5 <sup>a</sup> (-) | 6 (9.0)             |
| Dementia                                  | 68 (1.9)                                      | 14 (3.7)            | <5 <sup>a</sup> (-) | <5 <sup>a</sup> (-) | 46 (2.8)                                      | 15 (5.2)            | 6 (6.8)             | <5 <sup>a</sup> (-) | 28 (4.7)                                   | 8 (5.4)             | <5 <sup>a</sup> (-) | <5 <sup>a</sup> (-) |
| Chronic pulmonary disease                 | 229 (6.2)                                     | 36 (9.6)            | 25 (15.9)           | 9 (12.5)            | 128 (7.7)                                     | 45 (15.7)           | 13 (14.8)           | <5 <sup>a</sup> (-) | 50 (8.4)                                   | 11 (7.5)            | <5 <sup>a</sup> (-) | 5 (7.5)             |
| Rheumatic disease                         | 84 (2.3)                                      | 22 (5.9)            | 8 (5.1)             | <5 <sup>a</sup> (-) | 40 (2.4)                                      | 14 (4.9)            | 9 (10.2)            | <5 <sup>a</sup> (-) | 15 (2.5)                                   | <5 <sup>a</sup> (-) | <5 <sup>a</sup> (-) | <5 <sup>a</sup> (-) |
| Peptic ulcer disease                      | 92 (2.5)                                      | 14 (3.7)            | 10 (6.4)            | <5 <sup>a</sup> (-) | 48 (2.9)                                      | 11 (3.8)            | 5 (5.7)             | <5 <sup>a</sup> (-) | 20 (3.4)                                   | <5 <sup>a</sup> (-) | <5 <sup>a</sup> (-) | <5 <sup>a</sup> (-) |
| Mild liver disease                        | 29 (0.8)                                      | <5 <sup>a</sup> (-) | <5 <sup>a</sup> (-) | <5 <sup>a</sup> (-) | 18 (1.1)                                      | <5 <sup>a</sup> (-) | <5 <sup>a</sup> (-) | <5 <sup>a</sup> (-) | 8 (1.3)                                    | <5 <sup>a</sup> (-) | <5 <sup>a</sup> (-) | <5 <sup>a</sup> (-) |
| Severe liver disease                      | 11 (0.3)                                      | <5 <sup>a</sup> (-) | <5 <sup>a</sup> (-) | <5 <sup>a</sup> (-) | <5 <sup>a</sup> (-)                           | <5 <sup>a</sup> (-) | <5 <sup>a</sup> (-) | <5 <sup>a</sup> (-) | <5 <sup>a</sup> (-)                        | <5 <sup>a</sup> (-) | <5 <sup>a</sup> (-) | <5 <sup>a</sup> (-) |
| Diabetes without complications            | 245 (6.7)                                     | 52 (13.9)           | 23 (14.6)           | 17 (23.6)           | 145 (8.7)                                     | 54 (18.8)           | 16 (18.2)           | 8 (16.3)            | 80 (13.4)                                  | 23 (15.6)           | 5 (19.2)            | 15 (22.4)           |
| Diabetes with complications               | 21 (0.6)                                      | 11 (2.9)            | 7 (4.5)             | <5 <sup>a</sup> (-) | 23 (1.4)                                      | 15 (5.2)            | 6 (6.8)             | <5 <sup>a</sup> (-) | 18 (3.0)                                   | 7 (4.8)             | <5 <sup>a</sup> (-) | <5 <sup>a</sup> (-) |
| Hemiplegia                                | 15 (0.4)                                      | 5 (1.3)             | <5 <sup>a</sup> (-) | <5 <sup>a</sup> (-) | 14 (0.8)                                      | <5 <sup>a</sup> (-) | <5 <sup>a</sup> (-) | <5 <sup>a</sup> (-) | 7 (1.2)                                    | <5 <sup>a</sup> (-) | <5 <sup>a</sup> (-) | <5 <sup>a</sup> (-) |
| Malignancy                                | 336 (9.2)                                     | 47 (12.5)           | 25 (15.9)           | 10 (13.9)           | 144 (8.6)                                     | 24 (8.4)            | 13 (14.8)           | 7 (14.3)            | 50 (8.4)                                   | 12 (8.2)            | <5 <sup>a</sup> (-) | 14 (20.9)           |
| Metastatic malignancy                     | 51 (1.4)                                      | 11 (2.9)            | 5 (3.2)             | <5 <sup>a</sup> (-) | 23 (1.4)                                      | <5 <sup>a</sup> (-) | <5 <sup>a</sup> (-) | <5 <sup>a</sup> (-) | 6 (1.0)                                    | <5 <sup>a</sup> (-) | <5 <sup>a</sup> (-) | <5 <sup>a</sup> (-) |

Abbreviations: AKI, acute kidney injury (1-3 denote severity stage); eGFR, estimated glomerular filtration rate

<sup>a</sup>Results for human immunodeficiency virus, "other" ward location, and small numbers not reported to prevent patient identification at the request of clinical lead for Grampian Data Safe-Haven
