# Supplementary material for: Intermediate and Long-term Outcomes of Survivors of Acute Kidney Injury Episodes: A Large Population-Based Cohort Study
Source: PubMed Central journal article supplement (PMC5176133; doi:10.1053/j.ajkd.2016.05.018), 2017-01
Supplement: mmc2.pdf [file mmc2.pdf]

Table S2 – Crude long-term RRT outcomes up to 10 years

|               | Normal baseline (eGFR ≥60 ml/min/1.73m <sup>2</sup> ) |       |       |  |                |       |       |  | Baseline decreased kidney function (eGFR <60 ml/min/1.73m <sup>2</sup> ) |       |       |       |       |       |       |        | Prior AKI episodes |       |           |       |
|---------------|-------------------------------------------------------|-------|-------|--|----------------|-------|-------|--|--------------------------------------------------------------------------|-------|-------|-------|-------|-------|-------|--------|--------------------|-------|-----------|-------|
|               | No AKI                                                |       | AKI 1 |  | AKI 2          |       | AKI 3 |  | No AKI                                                                   |       | AKI 1 |       | AKI 2 |       | AKI 3 |        | No prior AKI       |       | Prior AKI |       |
| n             | 8269                                                  |       | 1263  |  | 541            |       | 354   |  | 5935                                                                     |       | 809   |       | 271   |       | 188   |        | 2738               |       | 688       |       |
| Long-term RRT |                                                       |       |       |  |                |       |       |  |                                                                          |       |       |       |       |       |       |        |                    |       |           |       |
| 1 year        |                                                       |       |       |  |                |       |       |  | 23                                                                       | (0.4) | 7     | (0.9) | 2     | (0.8) | 22    | (11.7) | 17                 | (0.6) | 14        | (2.0) |
| 5 years       |                                                       |       |       |  |                |       |       |  | 63                                                                       | (1.1) | 21    | (2.6) | 4     | (1.5) | 24    | (12.8) | 32                 | (1.2) | 18        | (2.6) |
| 10 years      | <sup>a</sup> 10                                       | (0.1) |       |  | <sup>a</sup> 6 | (0.3) |       |  | 86                                                                       | (1.4) | 26    | (3.2) | 5     | (1.8) | 28    | (14.9) | 44                 | (1.6) | 21        | (3.1) |

Note: The cohort includes all with abnormal kidney function and a 20% random sample of those with normal kidney function. Patients with no AKI and normal baseline are therefore under-represented in this table. Figures in brackets denote percentages.

Abbreviations: AKI, acute kidney injury (1-3 denote severity stage); eGFR, estimated glomerular filtration rate; RRT, renal replacement therapy

<sup>a</sup>Applies to all no AKI and AKI patients with normal baseline, small numbers do not allow AKI subgroups to be reported to prevent patient identification

Sawhney et al, *AJKD*, "Intermediate and Long-term Outcomes of Survivors of Acute Kidney Injury Episodes: A Large Population-Based Cohort Study"
