# Supplementary material for: Intermediate and Long-term Outcomes of Survivors of Acute Kidney Injury Episodes: A Large Population-Based Cohort Study
Source: PubMed Central journal article supplement (PMC5176133; doi:10.1053/j.ajkd.2016.05.018), 2017-01
Supplement: mmc3.pdf [file mmc3.pdf]

**Table S3 – Crude long-term RRT outcomes up to 10 years in eGFR subgroups**

|               | Normal baseline (eGFR ≥60ml/min/1.73m <sup>2</sup> ) |        |         |        | Baseline eGFR 45-59 ml/min/1.73m <sup>2</sup> |         |        |         | Baseline eGFR 30-44 ml/min/1.73m <sup>2</sup> |         |        |          | Baseline eGFR <30ml/min/1.73m <sup>2</sup> |           |          |           |
|---------------|------------------------------------------------------|--------|---------|--------|-----------------------------------------------|---------|--------|---------|-----------------------------------------------|---------|--------|----------|--------------------------------------------|-----------|----------|-----------|
|               | No AKI                                               | AKI 1  | AKI 2   | AKI 3  | No AKI                                        | AKI 1   | AKI 2  | AKI 3   | No AKI                                        | AKI 1   | AKI 2  | AKI 3    | No AKI                                     | AKI 1     | AKI 2    | AKI 3     |
| n             | 8269                                                 | 1263   | 541     | 354    | 3672                                          | 375     | 157    | 72      | 1666                                          | 287     | 88     | 49       | 597                                        | 147       | 26       | 67        |
| Long-term RRT |                                                      |        |         |        |                                               |         |        |         |                                               |         |        |          |                                            |           |          |           |
| 1 year        | 5 (0.1)                                              | <3 (-) | <3 (-)  | <3 (-) | <3 (-)                                        | <3 (-)  | <3 (-) | <3 (-)  | <3 (-)                                        | <3 (-)  | <3 (-) | 5 (10.2) | 22 (3.7)                                   | 6 (4.1)   | <3 (-)   | 15 (22.4) |
| 5 years       | 10 (0.1)                                             | <3 (-) | <3 (-)  | <3 (-) | 4 (0.1)                                       | 3 (0.8) | <3 (-) | 3 (4.2) | 11 (0.7)                                      | 3 (1.0) | <3 (-) | 5 (10.2) | 48 (8.0)                                   | 15 (10.2) | 3 (11.5) | 16 (23.9) |
| 10 years      | 10 (0.1)                                             | <3 (-) | 4 (0.7) | <3 (-) | 8 (0.2)                                       | 6 (1.6) | <3 (-) | 3 (4.2) | 21 (1.3)                                      | 3 (1.0) | <3 (-) | 6 (12.2) | 57 (9.5)                                   | 17 (11.6) | 3 (11.5) | 19 (28.4) |

Note: The cohort includes all with abnormal kidney function and a 20% random sample of those with normal kidney function. Patients with no AKI and normal baseline are therefore under-represented in this table. Figures in brackets denote percentages. Small numbers have been suppressed to avoid patient identification

Abbreviations: AKI, acute kidney injury (1-3 denote severity stage); eGFR, estimated glomerular filtration rate; RRT, renal replacement therapy
