# Supplementary material for: Intermediate and Long-term Outcomes of Survivors of Acute Kidney Injury Episodes: A Large Population-Based Cohort Study
Source: PubMed Central journal article supplement (PMC5176133; doi:10.1053/j.ajkd.2016.05.018), 2017-01
Supplement: mmc4.pdf [file mmc4.pdf]

**Table S4 – Sensitivity analyses for mortality after AKI vs no AKI (multivariable Cox regression)**

|                                     | Intermediate mortality (30-365 days) |                         |                             | Long-term mortality (1-10 years) limited to those aged <75 years |                         |                             | Long-term mortality (1-10 years) limited to AKI without complete recovery |                         |                             | Long-term mortality (1-10 years) limited to AKI with prior AKI episodes |                         |                             |
|-------------------------------------|--------------------------------------|-------------------------|-----------------------------|------------------------------------------------------------------|-------------------------|-----------------------------|---------------------------------------------------------------------------|-------------------------|-----------------------------|-------------------------------------------------------------------------|-------------------------|-----------------------------|
|                                     | N                                    | Age-sex adjusted        | Fully adjusted <sup>a</sup> | N                                                                | Age-sex adjusted        | Fully adjusted <sup>a</sup> | N                                                                         | Age-sex adjusted        | Fully adjusted <sup>a</sup> | N                                                                       | Age-sex adjusted        | Fully adjusted <sup>a</sup> |
| eGFR ≥ 60, no AKI (reference)       | 8161                                 | 1.0                     | 1.0                         | 6461                                                             | 1.0                     | 1.0                         | 7741                                                                      | 1.0                     | 1.0                         | 7741                                                                    | 1.0                     | 1.0                         |
| eGFR ≥ 60, AKI                      | 1785                                 | 3.70 (3.23-4.24)        | 2.48 (2.15-2.88)            | 855                                                              | 2.19 (1.94-2.47)        | 1.50 (1.31-1.72)            | 683                                                                       | 1.71 (1.53-1.90)        | 1.42 (1.26-1.59)            | 198                                                                     | 2.45 (2.05-2.93)        | 1.64 (1.36-1.97)            |
| <b>AKI vs no AKI for eGFR group</b> |                                      | <b>3.70 (3.23-4.24)</b> | <b>2.48 (2.15-2.88)</b>     |                                                                  | <b>2.19 (1.94-2.47)</b> | <b>1.50 (1.31-1.72)</b>     |                                                                           | <b>1.71 (1.53-1.90)</b> | <b>1.42 (1.26-1.59)</b>     |                                                                         | <b>2.45 (2.05-2.93)</b> | <b>1.64 (1.36-1.97)</b>     |
| eGFR 45-59, no AKI                  | 3561                                 | 0.90 (0.77-1.05)        | 0.90 (0.77-1.04)            | 1475                                                             | 1.24 (1.11-1.38)        | 1.18 (1.05-1.32)            | 3243                                                                      | 1.09 (1.02-1.17)        | 1.07 (1.00-1.14)            | 3243                                                                    | 1.09 (1.02-1.17)        | 1.07 (1.00-1.15)            |
| eGFR 45-59, AKI                     | 500                                  | 3.12 (2.57-3.79)        | 2.24 (1.83-2.74)            | 123                                                              | 2.30 (1.80-2.94)        | 1.67 (1.29-2.15)            | 133                                                                       | 1.88 (1.54-2.29)        | 1.42 (1.16-1.75)            | 78                                                                      | 2.10 (1.64-2.70)        | 1.18 (0.91-1.53)            |
| <b>AKI vs no AKI for eGFR group</b> |                                      | <b>3.47 (2.85-4.21)</b> | <b>2.50 (2.04-3.06)</b>     |                                                                  | <b>1.86 (1.45-2.39)</b> | <b>1.41 (1.09-1.83)</b>     |                                                                           | <b>1.72 (1.41-2.09)</b> | <b>1.33 (1.09-1.63)</b>     |                                                                         | <b>1.92 (1.50-2.46)</b> | <b>1.10 (0.85-1.43)</b>     |
| eGFR 30-44, no AKI                  | 1562                                 | 1.25 (1.06-1.49)        | 1.20 (1.01-1.43)            | 383                                                              | 1.94 (1.65-2.28)        | 1.60 (1.35-1.89)            | 1337                                                                      | 1.44 (1.33-1.57)        | 1.36 (1.25-1.48)            | 1337                                                                    | 1.45 (1.33-1.57)        | 1.36 (1.25-1.48)            |
| eGFR 30-44, AKI                     | 345                                  | 3.44 (2.79-4.24)        | 2.29 (1.84-2.86)            | 56                                                               | 3.72 (2.70-5.12)        | 2.52 (1.80-3.53)            | 72                                                                        | 2.28 (1.78-2.92)        | 1.68 (1.30-2.17)            | 57                                                                      | 3.00 (2.27-3.96)        | 1.52 (1.14-2.03)            |
| <b>AKI vs no AKI for eGFR group</b> |                                      | <b>2.74 (2.20-3.41)</b> | <b>1.90 (1.51-2.39)</b>     |                                                                  | <b>1.92 (1.36-2.71)</b> | <b>1.58 (1.10-2.25)</b>     |                                                                           | <b>1.58 (1.23-2.02)</b> | <b>1.24 (0.96-1.60)</b>     |                                                                         | <b>2.07 (1.56-2.73)</b> | <b>1.12 (0.83-1.49)</b>     |
| eGFR < 30, no AKI                   | 531                                  | 1.75 (1.40-2.18)        | 1.57 (1.26-1.97)            | 129                                                              | 3.36 (2.67-4.24)        | 2.53 (1.98-3.22)            | 425                                                                       | 2.03 (1.80-2.29)        | 1.80 (1.60-2.04)            | 425                                                                     | 2.04 (1.81-2.30)        | 1.81 (1.61-2.05)            |
| eGFR < 30, AKI                      | 192                                  | 4.09 (3.16-5.29)        | 2.57 (1.95-3.37)            | 46                                                               | 3.09 (2.06-4.64)        | 2.73 (1.79-4.17)            | 35                                                                        | 2.49 (1.70-3.64)        | 2.27 (1.54-3.34)            | 37                                                                      | 2.29 (1.61-3.27)        | 1.71 (1.18-2.47)            |
| <b>AKI vs no AKI for eGFR group</b> |                                      | <b>2.33 (1.73-3.16)</b> | <b>1.63 (1.20-2.22)</b>     |                                                                  | <b>0.92 (0.58-1.45)</b> | <b>1.08 (0.68-1.72)</b>     |                                                                           | <b>1.23 (0.83-1.82)</b> | <b>1.26 (0.84-1.87)</b>     |                                                                         | <b>1.12 (0.78-1.62)</b> | <b>0.94 (0.65-1.37)</b>     |

Note: Adjusted hazard ratios are reported with reference to no AKI and normal baseline function (plain type); and for baseline eGFR groups calculated using the interaction terms (bold type). 95% confidence intervals are reported in brackets.

Abbreviations: AKI, acute kidney injury; eGFR, estimated glomerular filtration rate.

<sup>a</sup>Adjusted for age, sex, Charlson comorbidities, hospital admission circumstances, ICD-10 categories for acute hospital admission diagnoses, and with interaction terms between AKI and baseline eGFR.
